# Supplementary material for: Ginsenoside Rb1 enhanced immunity and altered the gut microflora in mice immunized by H1N1 influenza vaccine
Source: PeerJ. 2023 Oct 17;11:e16226. doi: 10.7717/peerj.16226 (PMC10588687; doi:10.7717/peerj.16226)
Supplement: Supplemental Information 1 [file peerj-11-16226-s001.xls]

## Sheet: Raw data
figure 1-B	PBS	HA	HA+Alum	HA+Rb1-70ug	HA+Rb1-200ug	HA+Rb1-600ug		figure 1-C	HA	HA+Alum	HA+Rb1-70ug	HA+Rb1-200ug	HA+Rb1-600ug		figure 1-D	HA	HA+Alum	HA+Rb1-70ug	HA+Rb1-200ug	HA+Rb1-600ug			figure 1-E	HA	HA+Alum	HA+Rb1-70ug	HA+Rb1-200ug	HA+Rb1-600ug
	5	11	15	12	15	14			7	12	12	11	12			7	13	13	12	11				9	12	10	12	13
	5	10	14	13	14	15			10	9	10	11	13			10	11	10	12	10				9	13	10	10	13
	5	10	13	14	14	15			7	14	11	12	14			8	10	9	12	11				8	12	11	10	13
	5	10	15	13	15	14			7	12	11	12	14			9	7	9	11	12				9	13	13	10	12
	5	10	14	12	12	14			7	14	12	12	13			10	11	10	10	13				8	12	10	9	13
	5	10	12	12	13	16			10		9	13	14			9		8	10	13				11		8	9	12
figure 1-F	PBS							HA							Alum							HA+Rb1-70							HA+Rb1-200							HA+Rb1-600
	100	100	100	100	100	100	100	100	100	100	100	100	100	100	100	100	100	100	100	100	100	100	100	100	100	100	100	100	100	100	100	100	100	100	100	100	100	100	100	100	100	100
Day1	96.6832	98.7624	102.228	100.495	97.0297	97.7228	100.149	96.446	98.4907	100.536	96.7868	94.4012	97.1276	99.8539	100.252	103.782	93.1921	104.841	101.664	103.429	102.723	103.704	98.0981	91.0911	94.9449	103.704	105.455	103.353	101.871	106.965	93.8669	100.78	105.146	101.507	99.3243	90.1488	105.233	104.515	100.564	107.029	101.642	98.4094
Day2	95.297	102.921	99.1089	95.6436	96.3366	100.149	95.297	101.558	97.1276	96.1052	98.15	99.5131	97.1276	101.558	98.1341	103.782	104.488	93.1921	103.782	100.605	96.7221	104.404	97.7477	92.4925	105.455	104.054	104.404	101.251	96.7775	105.873	108.056	102.599	103.69	104.782	100.416	103.079	99.8461	92.3037	103.079	104.156	106.67	107.388
Day3	94.604	88.0198	92.8713	92.8713	90.7921	90.4455	86.9802	98.4907	89.9708	88.9484	90.9932	87.926	89.63	98.8315	87.5441	93.5451	91.4271	90.7211	105.194	88.9561	88.9561	104.404	105.105	91.7918	97.047	97.047	96.3463	102.302	101.871	106.601	95.6861	106.237	104.782	96.7775	105.509	102.719	105.593	81.529	101.283	108.107	100.205	104.156
Day4	98.4158	91.8317	82.4752	79.3564	88.3663	91.4851	84.2079	82.814	83.4956	82.1324	82.1324	92.0156	84.1772	98.15	87.1911	84.0141	81.1901	86.1321	104.135	79.7781	81.5431	86.8869	91.0911	95.2953	87.9379	102.653	98.7988	101.952	105.146	105.873	94.5946	91.684	104.054	101.871	106.601	102.001	101.642	106.67	104.156	74.705	107.388	98.0503
Day5	86.6337	80.396	75.5446	75.5446	76.9307	74.1584		95.7644	77.702	75.6573	75.3165	77.0204	85.1996	78.3836	106.253	73.7771	86.1321	74.4831	77.6601	79.4251	74.4831	93.8939	104.404	104.054	81.2813	80.2302	91.4414	91.4414	89.1372	102.599	98.2328	100.78	101.143	102.963	91.3202	108.107	105.233	108.107	103.797	102.719	92.3037
Day6	72.0792	70.3465						72.5901	79.7468	72.5901	72.9309	94.742	71.5677		81.8961	74.8361	103.782	72.7181				103.003	76.3764	90.3904	87.2372	102.653	75.6757	85.4855	95.3222	101.507	96.7775	108.42	107.328	83.316	108.056	109.903	105.593	87.6347	102.36	107.748	99.8461
Day7								91.334	70.2045	77.0204	70.2045				80.8371	107.312						104.755	84.4344	72.8729	104.054	91.7918	84.4344	74.2743	99.6881	110.967	92.4116	110.239	96.4137	77.8586	109.148	106.311	86.9164	111.339	94.4587	101.642	109.184
Day8								87.2444	72.9309						85.0731	102.017						79.1792	70.7708	85.1351	70.4204	103.353	90.04		87.3181	73.4927	110.239	98.2328	109.148	109.875	85.499	103.079	107.029	88.353	109.543	104.515	81.1698
Day9								94.0604	73.2717						91.4271	96.0161						104.404	73.2232	92.4925	79.8799	91.4414	104.404		111.694	112.422	97.5052	111.331	81.8607	81.1331	70.2183	103.438	105.593	86.5572	76.5008	108.466	110.262
Day10								92.0156	73.6125						93.1921	85.4261						103.003	88.989	78.4785	73.5736	101.602	91.0911		95.6861	109.148	79.6778	110.239	107.692	80.0416		86.1981	75.0641	103.797	106.67	108.107	99.8461
Day11								94.4012	80.0876						95.3101	91.4271						77.7778	104.404	94.5946	103.704	91.7918	88.2883		95.6861	108.784	109.148	76.7672	77.4948	109.148		104.874	101.283	104.515	108.107	93.3812	79.0149
Day12								94.0604	82.1324						95.6631	90.3681						89.6897	104.755	104.755	94.9449	92.8428	79.8799		96.0499	113.15	80.4054	78.2225	110.239	110.239		79.374	95.177	102.36	104.874	109.184	106.311
Day13								95.0828	81.7916						96.7221	91.7801						105.105	105.105	94.5946	90.04	96.3463	80.2302		110.967	97.1414	113.877	81.1331	80.0416	111.331		80.8107	109.543	105.593	96.6136	102.719	105.593
Day14								94.742	83.4956						97.4281	92.8391						105.455	105.806	90.7407	96.6967	95.2953	80.5806		114.605	81.8607	82.5884	98.2328	110.967	111.694		81.529	96.9728	106.311	103.797	110.262	104.156
figure 1-G		PBS	HA	Alum	HA+Rb1 70ug	HA+Rb1 200ug	HA+Rb1 600ug		figure 2-G	Control	Mod	HA	HA+Alum	HA+Rb1-70ug	HA+Rb1-200ug	HA+Rb1-600ug
	Day 4						1			4.24354	107.105	87.4801	50.4297	59.0579	44.6776	32.4966
	5	1								9.14976	101.184	30.2973	38.2487	73.6073	59.9038	42.6474
	6	1								12.5334	117.256	71.0696	70.2237	58.8887	48.7379	28.0979
	6	1										62.1031		58.0428	31.4815	17.9471
	6	1
	6	1							figure 2-H	Control	Mod	HA	HA+Alum	HA+Rb1-70ug	HA+Rb1-200ug	HA+Rb1-600ug
	6		1							2.42624	80.9705	47.3373	28.8462	48.7112	46.7648	22.6634
	6			1						3.11322	75.6178	72.784	35.5156	54.0353	42.4712	30.4205
	6			1						5.14552	93.4506	76.362	31.6227	54.4074	42.3281	25.0678
	6			1								75.1026		59.9891	44.6466	18.9709
	7	1
	7	1							figure 3-B	PBS	IIV4	IIV4+Rb1 200ug
	7		1							5	8	11
	7		1							5	11	8
	7			1						5	6	8
	7			1						5	11	10
	8		1							5	8	11
	8		1							5	7	9
	8				1
	10					1			figure 3-C	PBS	IIV4	IIV4+Rb1 200ug
	14		0							5	8	10
	14		0							5	9	10
	14			0						5	8	10
	14			0						5	10	10
	14				0					5	10	8
	14				0					5	8	8
	14				0
	14				0				figure 3-D	PBS	IIV4	IIV4+Rb1 200ug
	14				0					5	9	9
	14				0					5	9	9
	14					0				5	7	9
	14					0				5	9	9
	14					0				5	9	8
	14					0				5	8	8
	14					0
	14					0			figure 3-E	PBS	IIV4	IIV4+Rb1 200ug
	14						0			5	9	9
	14						0			5	8	7
	14						0			5	6	8
	14						0			5	9	9
	14						0			5	9	10
	14						0			5	6	11
figure 4A-4D	ID	shannon	simpson	chao1	ace	goods_coverage		table-1	Sample	raw_tags	singleton	tagsmatchedASVs	ASVs
	PBS1	5.30238	0.928863	877.667	912.536	0.99875			PBS1	124570	125	122272	826
	PBS2	5.49638	0.937764	887.348	919.805	0.99878			PBS2	124373	122	121097	835
	PBS3	4.77469	0.917313	740.214	788.34	0.99861			PBS3	124474	139	122397	667
	PBS4	4.84884	0.912817	389.75	392.064	0.99984			PBS4	103995	16	102926	386
	PBS5	6.92376	0.983878	765	791.499	0.99899			PBS5	124892	101	123043	715
	PBS6	4.84755	0.89028	682.731	709.481	0.99906			PBS6	124633	94	121374	646
	HA1	5.13338	0.938616	794.579	832.285	0.99857			HA1	124777	143	121958	714
	HA2	5.09526	0.937068	788.219	830.334	0.99868			HA2	124648	132	121867	729
	HA3	6.1129	0.960703	1003.93	982.039	0.998721			HA3	124591	128	119808	906
	HA4	5.14237	0.946426	796.773	833.473	0.99859			HA4	124726	141	122762	722
	HA5	4.99496	0.925188	800.544	845.468	0.9986			HA5	124718	140	121702	729
	HA6	6.53847	0.970576	934.904	962.365	0.9988			HA6	124748	120	121501	886
	ALum.HA1	6.46051	0.963945	813.11	843.133	0.99901			ALum.HA1	124744	99	121647	772
	ALum.HA2	5.75539	0.91029	928.739	910.951	0.999			ALum.HA2	124747	100	118574	857
	ALum.HA3	5.65761	0.913982	851.281	870.482	0.99902			ALum.HA3	124376	98	121330	812
	ALum.HA4	6.63898	0.978122	772.846	793.563	0.99904			ALum.HA4	124793	96	120587	729
	ALum.HA5	5.37261	0.932034	755.533	757.807	0.99905			ALum.HA5	124697	95	118180	696
	ALum.HA6	6.47943	0.974133	833.143	827.162	0.998991			ALum.HA6	124852	101	119524	761
	Rb1.HA1	4.64089	0.903407	773.512	825.453	0.9987			Rb1.HA1	124750	130	122054	723
	Rb1.HA2	4.1367	0.798798	774.057	812.829	0.99854			Rb1.HA2	124674	146	122287	688
	Rb1.HA3	5.4147	0.92596	924.315	960.084	0.99877			Rb1.HA3	124634	123	121162	878
	Rb1.HA4	6.46695	0.965737	1014.51	995.671	0.998871			Rb1.HA4	124598	113	114174	929
	Rb1.HA5	5.97561	0.953203	947.688	980.789	0.99874			Rb1.HA5	124716	126	121775	893
	Rb1.HA6	5.13357	0.9203	819.451	850.674	0.99879			Rb1.HA6	124644	121	120365	772
